# Supplementary material
Source: PubMed Central journal article supplement (PMC5522810)
Supplement: NIHMS879706-supplement-suppl__fig__S1-S3.pdf [file NIHMS879706-supplement-suppl__fig__S1-S3.pdf]

## Supplementary Figures

**Fig. S1**

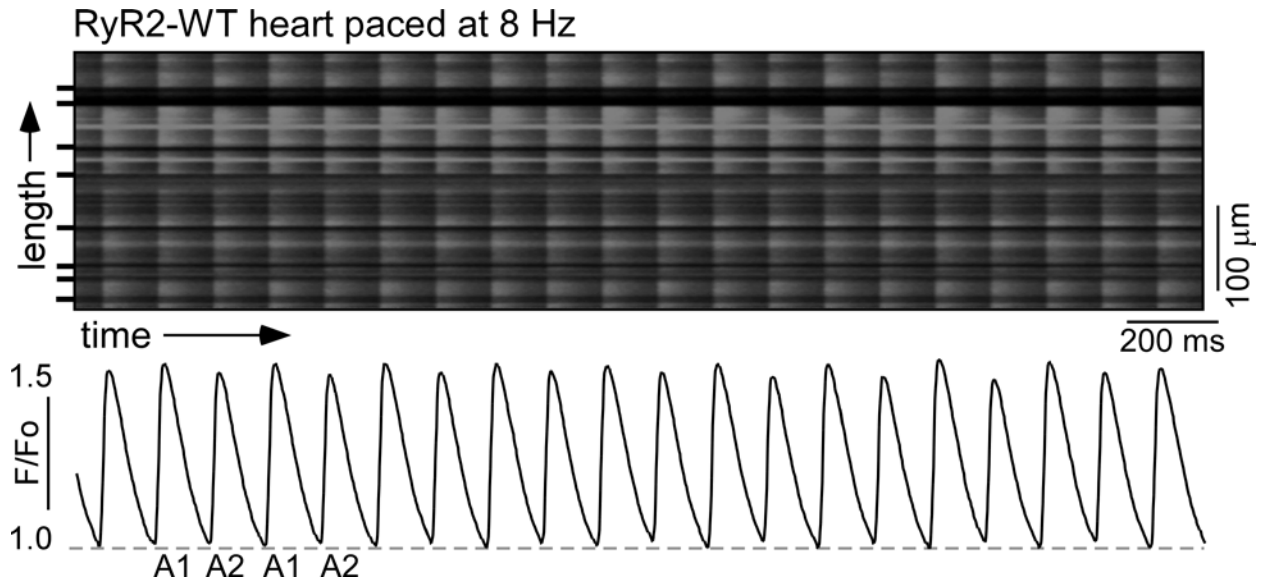

**Figure S1.  $\text{Ca}^{2+}$  transient alternans in intact RyR2-WT hearts.**

Langendorff-perfused RyR2-WT hearts were loaded with Rhod-2 AM.  $\text{Ca}^{2+}$  transients were elicited by pacing at 8 Hz, and recorded using line-scanning confocal imaging. Cell boundaries were indicated by black bars. The F/Fo traces depict the average fluorescence signal of the scan area.

**Fig. S2**

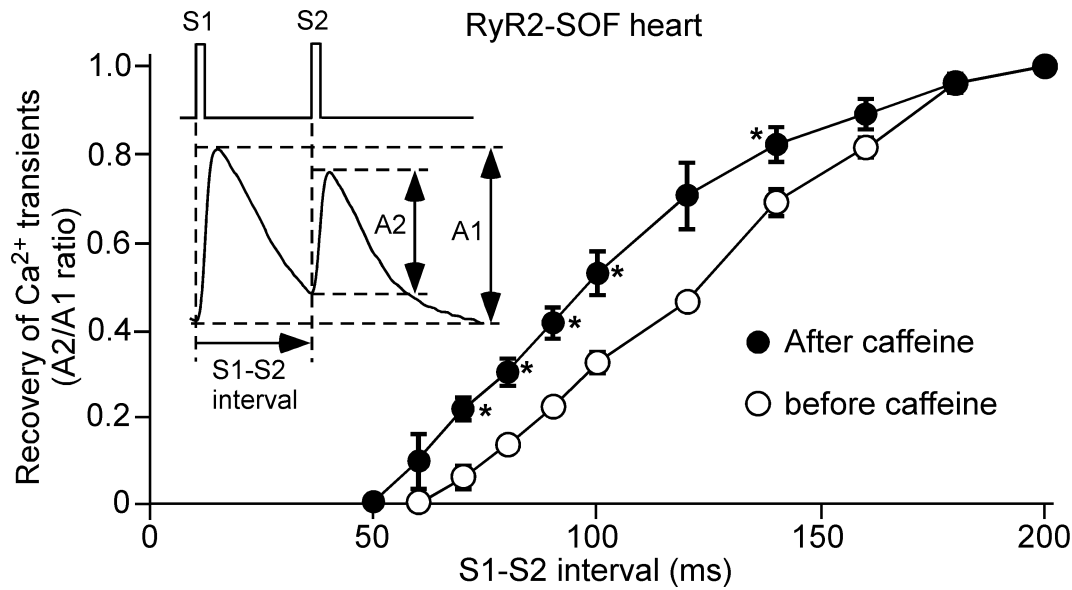

**Figure S2. Caffeine shortens the refractoriness of Ca<sup>2+</sup> transients.**

Langendorff-perfused RyR2-SOF mutant hearts were loaded with Rhod-2 AM. Hearts were first stimulated at 5 Hz for 30 seconds (S1), followed by a single S2 stimulation. A series of S1S2 stimulations are repeatedly applied with progressively reduced S1S2 interval from 200 to 50 ms. The amplitude of Ca<sup>2+</sup> transients was recorded using the line-scan mode. The relationship between S2/S1 ratio of Ca<sup>2+</sup> transient amplitude and S1S2 interval is shown. Data shown are mean  $\pm$  SEM (n=3 RyR2-SOF hearts) (\*p<0.05).

**Fig. S3**

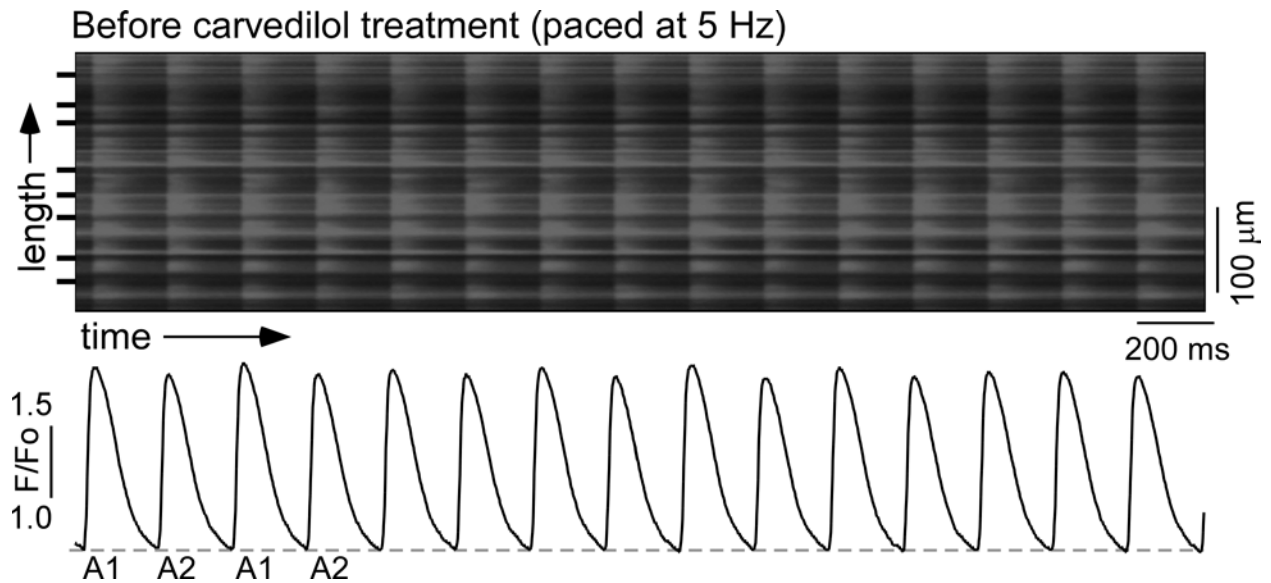

**Figure S3.  $\text{Ca}^{2+}$  transients in intact RyR2-SOF hearts before carvedilol treatment.**

Langendorff-perfused RyR2-SOF mutant hearts were loaded with Rhod-2 AM.  $\text{Ca}^{2+}$  transients were elicited in intact RyR2-SOF hearts by pacing at 5 Hz, and recorded before the application of carvedilol using the line-scan mode. Cell boundaries were indicated by the black bars. The F/Fo traces depict the average fluorescence signal of the scan area.
